# Supplementary material for: Publication Trends in Neglected Tropical Diseases in Latin America and the Caribbean: A Bibliometric Analysis
Source: Preprints.org preprint supplement (doi:10.20944/preprints202012.0249.v1), 2020-12-10
Supplement: Supplementary file 1 [file supplementary]

|  | **Country** | **Buruli ulcer** | **Chagas disease** | **Chromomycosis** | **Cysticercosis** | **Dengue** | **Zika** | **Chikungunya** | **Hydatid cyst** | **Fascioliasis** | **Leishmaniasis** | **Leprosy** | **Lymphatic filariasis** | **Mycetoma** | **Onchocerciasis** | **Rabies** | **Schistosomiasis** | **Soil Transmitted Helminthiasis** | **Trachoma** | **Yaws** | **Malaria** | **HIV/AIDS** | **Tuberculosis** |
| --- | --- | --- | --- | --- | --- | --- | --- | --- | --- | --- | --- | --- | --- | --- | --- | --- | --- | --- | --- | --- | --- | --- | --- |
| 1 | United States | 113 | 2197 | 31 | 354 | 5096 | 4118 | 1594 | 261 | 136 | 2618 | 887 | 871 | 74 | 543 | 1323 | 1910 | 842 | 2099 | 55 | 16322 | 22041 | 16485 |
| 2 | Brazil | 5 | 3978 | 131 | 140 | 2173 | 1596 | 651 | 87 | 84 | 4574 | 1237 | 66 | 35 | 57 | 303 | 1183 | 271 | 150 | 3 | 2258 | 1661 | 2993 |
| 3 | Mexico | 3 | 506 | 27 | 190 | 557 | 171 | 143 | 25 | 36 | 235 | 76 | 3 | 43 | 26 | 73 | 14 | 41 | 31 | 2 | 258 | 305 | 999 |
| 4 | Colombia | 2 | 438 | 7 | 3 | 539 | 287 | 229 | 5 | 16 | 405 | 53 |  | 1 | 4 | 32 | 9 | 52 | 24 |  | 713 | 183 | 458 |
| 5 | Argentina |  | 1357 | 2 | 14 | 230 | 89 | 60 | 155 | 78 | 246 | 21 | 6 | 4 | 9 | 26 | 22 | 89 | 52 |  | 137 | 255 | 534 |
| 6 | Canada | 4 | 201 | 4 | 27 | 380 | 309 | 106 | 70 | 28 | 524 | 107 | 52 |  | 58 | 207 | 194 | 103 | 166 | 3 | 1471 | 2345 | 2236 |
| 7 | Peru | 3 | 125 | 4 | 171 | 154 | 52 | 24 | 48 | 59 | 190 | 8 | 1 | 1 | 4 | 27 | 9 | 64 | 21 |  | 346 | 168 | 586 |
| 8 | Venezuela |  | 235 | 2 | 15 | 132 | 59 | 47 | 2 | 8 | 150 | 15 | 2 | 1 | 9 | 2 | 20 | 33 | 6 |  | 139 | 35 | 101 |
| 9 | Chile |  | 320 | 1 | 6 | 31 | 29 | 13 | 77 | 21 | 42 | 11 | 2 | 3 |  | 29 | 6 | 7 | 15 |  | 73 | 126 | 195 |
| 10 | Ecuador |  | 100 |  | 50 | 83 | 57 | 45 | 4 | 7 | 67 | 7 | 2 |  | 8 | 3 | 5 | 42 | 2 |  | 69 | 19 | 60 |
| 11 | Guatemala |  | 48 | 1 | 1 | 17 | 19 | 8 |  | 1 | 5 |  |  |  | 21 | 6 | 1 | 4 | 5 |  | 40 | 18 | 24 |
| 12 | Cuba |  | 30 | 1 | 1 | 169 | 16 | 5 | 2 | 26 | 73 | 11 |  |  |  | 5 | 3 | 10 | 4 | 1 | 46 | 39 | 81 |
| 13 | Bolivia |  | 172 |  | 2 | 22 | 17 | 20 | 2 | 5 | 51 | 3 |  |  | 1 | 1 | 2 | 18 | 1 |  | 33 | 4 | 20 |
| 14 | Haiti |  |  |  |  | 12 | 8 | 11 |  |  |  | 1 | 40 |  | 2 | 23 | 3 | 3 | 3 |  | 89 | 55 | 73 |
| 15 | Dominican Republic |  | 1 | 1 |  | 21 | 11 | 20 |  | 2 |  |  | 8 | 1 |  | 4 | 1 | 1 |  |  | 18 | 19 | 13 |
| 16 | Honduras |  | 15 |  | 2 | 24 | 27 | 8 |  |  | 6 | 1 |  |  |  |  |  | 11 | 1 |  | 26 | 16 | 13 |
| 17 | Paraguay |  | 82 |  |  | 38 | 7 | 7 |  | 1 | 45 | 2 |  |  |  | 1 |  | 4 | 2 |  | 6 | 6 | 17 |
| 18 | Nicaragua |  | 13 |  | 6 | 135 | 67 | 27 |  |  | 2 | 1 |  |  |  |  |  | 6 |  |  | 7 | 1 |  |
| 19 | El Salvador |  | 17 |  |  | 17 | 7 | 5 | 2 |  | 2 | 1 |  |  |  | 1 |  | 1 | 2 |  | 9 | 5 | 8 |
| 20 | Costa Rica |  | 15 | 1 |  | 42 | 10 | 13 |  |  | 21 |  |  |  |  | 5 |  | 1 | 1 |  | 40 | 8 | 19 |
| 21 | Panama |  | 55 |  | 1 | 51 | 18 | 22 | 1 |  | 50 |  |  | 1 | 1 | 6 |  | 2 | 1 |  | 99 | 7 | 34 |
| 22 | Puerto Rico (US)[5] |  |  |  |  |  |  |  |  |  |  |  |  |  |  |  |  |  |  |  |  |  |  |
| 23 | Uruguay |  | 225 |  | 9 | 55 | 27 | 9 | 90 | 48 | 51 | 1 | 1 |  |  | 6 | 31 | 1 |  |  | 25 | 25 | 74 |
| 24 | Jamaica |  | 1 |  |  | 18 | 10 | 14 |  |  |  | 1 |  |  |  |  | 1 | 2 | 1 |  | 16 | 34 | 17 |
| 25 | Trinidad and Tobago |  | 1 |  | 2 | 42 | 21 | 18 |  |  | 1 | 2 | 1 |  |  | 8 |  |  |  |  | 9 | 6 | 17 |
| 26 | Guyana |  | 1 |  |  | 1 | 3 |  |  |  | 2 |  | 2 |  |  | 1 |  |  |  |  | 13 | 3 | 6 |
| 27 | Suriname |  | 1 |  |  | 4 | 12 | 4 |  |  | 8 | 3 |  |  |  | 1 |  |  | 6 |  | 40 |  | 3 |
| 28 | Guadeloupe (France) |  |  |  |  |  |  |  |  |  |  |  |  |  |  |  |  |  |  |  |  |  |  |
| 29 | Martinique (France) |  |  |  |  |  |  |  |  |  |  |  |  |  |  |  |  |  |  |  |  |  |  |
| 30 | Bahamas |  |  |  |  |  | 1 |  |  |  |  |  |  |  |  |  |  |  |  |  |  | 7 |  |
| 31 | Belize |  |  |  |  | 3 | 1 | 1 |  |  |  |  |  |  |  |  |  |  |  |  | 9 | 2 | 1 |
| 32 | Barbados |  |  |  |  | 13 | 3 | 3 |  |  |  |  |  |  |  |  |  |  |  |  | 5 | 5 | 2 |
| 33 | French Guiana (France) | 3 | 12 | 1 |  |  | 36 | 29 | 1 |  | 32 | 5 | 1 | 1 |  | 7 | 1 | 5 | 1 |  | 104 | 14 | 16 |
| 34 | Saint Lucia |  |  |  |  |  |  | 1 |  |  |  |  |  |  |  |  | 3 |  |  |  | 3 | 2 | 2 |
| 35 | Curaçao (Kingdom of the Netherlands) |  |  |  |  | 2 | 3 | 8 |  |  |  |  |  |  |  |  |  |  |  |  | 1 |  | 1 |
| 36 | Aruba (Kingdom of the Netherlands) |  |  |  |  |  | 1 | 5 |  |  |  |  |  |  |  |  |  | 1 |  |  |  | 1 |  |
| 37 | Saint Vincent and the Grenadines |  |  |  |  |  | 1 |  |  |  |  |  |  |  |  |  |  |  |  |  |  | 1 |  |
| 38 | United States Virgin Islands (US) |  |  |  |  |  |  |  |  |  |  |  |  |  |  |  |  |  |  |  |  |  |  |
| 39 | Grenada |  |  |  | 2 | 9 | 5 | 15 | 8 |  | 2 |  |  |  |  | 4 | 4 | 3 |  |  | 9 | 8 | 4 |
| 40 | Antigua and Barbuda |  |  |  |  |  |  |  |  |  |  |  |  |  |  |  |  | 1 |  |  | 1 | 1 | 3 |
| 41 | Dominica |  |  |  |  | 2 | 2 | 2 |  |  |  |  |  |  |  |  | 1 |  |  |  |  |  |  |
| 42 | Bermuda (UK) |  |  |  |  |  |  |  |  |  |  |  |  |  |  |  |  |  |  |  |  |  |  |
| 43 | Cayman Islands (UK) |  |  |  |  | 2 | 1 | 1 |  |  |  |  |  |  |  |  |  |  |  |  |  | 1 |  |
| 44 | Greenland (Denmark) |  |  |  |  |  |  |  |  |  |  |  |  |  |  |  |  |  |  |  |  |  |  |
| 45 | Saint Kitts and Nevis |  |  |  |  | 8 |  | 4 | 1 |  | 5 |  | 1 |  |  | 20 | 6 | 6 |  |  |  | 2 | 2 |
| 46 | Sint Maarten (Kingdom of the Netherlands) |  |  |  |  | 1 |  |  |  |  |  |  |  |  |  |  |  |  |  |  |  |  |  |
| 47 | Turks and Caicos Islands (UK) |  |  |  |  |  |  |  |  |  |  |  |  |  |  |  |  |  |  |  |  | 1 |  |
| 48 | Saint Martin (France) |  |  |  |  |  |  | 2 |  |  |  |  |  |  |  |  |  |  | 1 |  |  | 2 |  |
| 49 | British Virgin Islands (UK) |  |  |  |  |  |  |  |  |  |  |  |  |  |  |  |  |  |  |  |  |  |  |
| 50 | Caribbean Netherlands (Kingdom of the Netherlands) |  |  |  |  |  |  |  |  |  |  |  |  |  |  |  |  |  |  |  | 1 |  | 1 |
| 51 | Anguilla (UK) |  |  |  |  |  |  |  |  |  |  |  |  |  |  |  |  |  |  |  |  | 2 | 7 |
| 52 | Saint Barthélemy (France) |  |  |  |  |  |  |  |  |  |  |  |  |  |  |  |  |  |  |  |  |  |  |
| 53 | Saint Pierre and Miquelon (France) |  |  |  |  |  |  |  |  |  |  |  |  |  |  |  |  |  |  |  |  |  |  |
| 54 | Montserrat (UK) |  |  |  |  |  |  |  |  |  |  |  |  |  |  |  |  |  |  |  |  |  |  |
| 55 | Falkland Islands (UK)[6] |  |  |  |  |  |  |  |  |  |  |  |  |  |  |  |  |  |  |  |  |  |  |
